# Supplementary material for: Three Conceptual Impediments to Developing Scale Theory for Formative Scales
Source: Atypon-hosted journal article supplement (doi:10.1027/1614-2241/a000154), 2018-10-01

## Figures Referred to in Article

Figure 1: Formative and reflective measurement models.

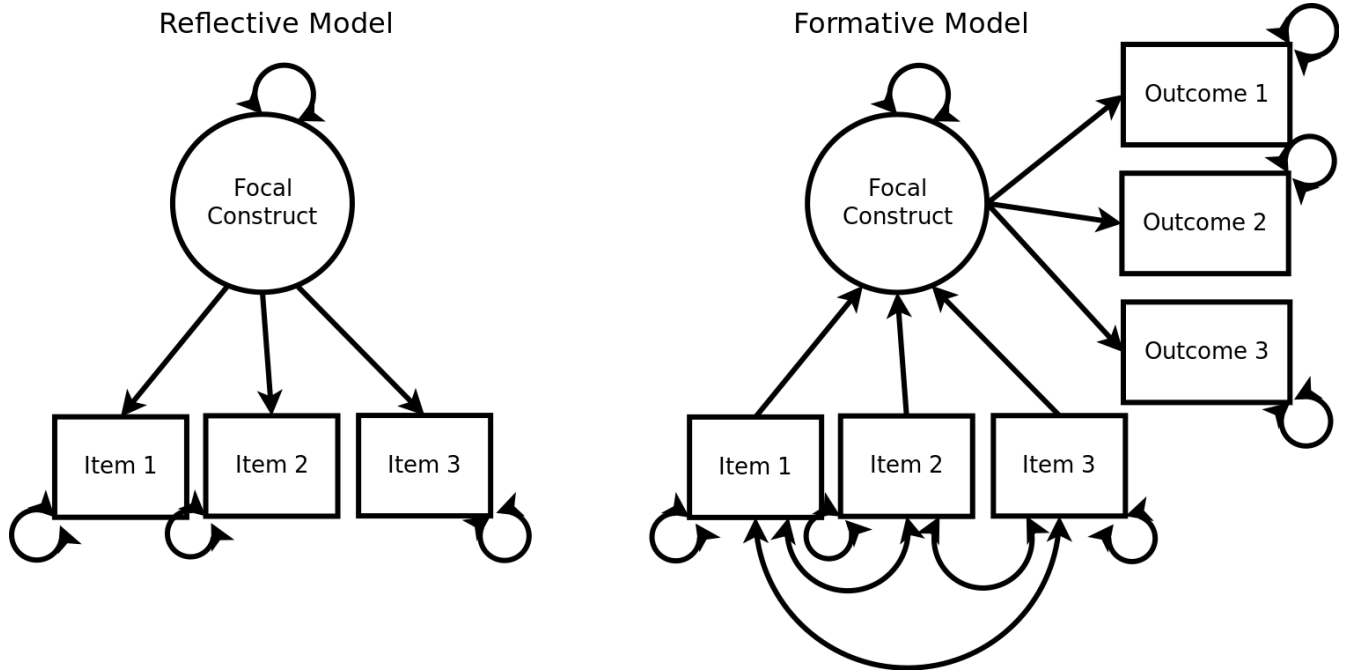

Figure 2: Formative model with a method factor.

### Formative Model with Method Factor

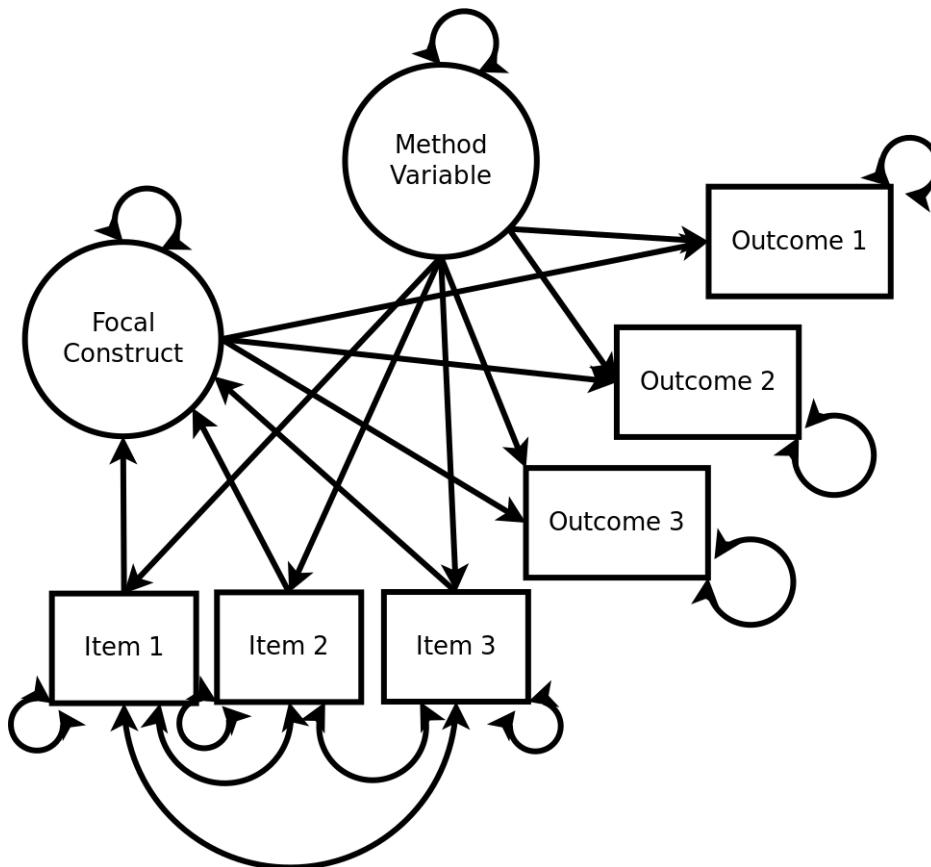

Figure 3: Formative model and MIMIC model for example from Bollen & Lennox, 1991.

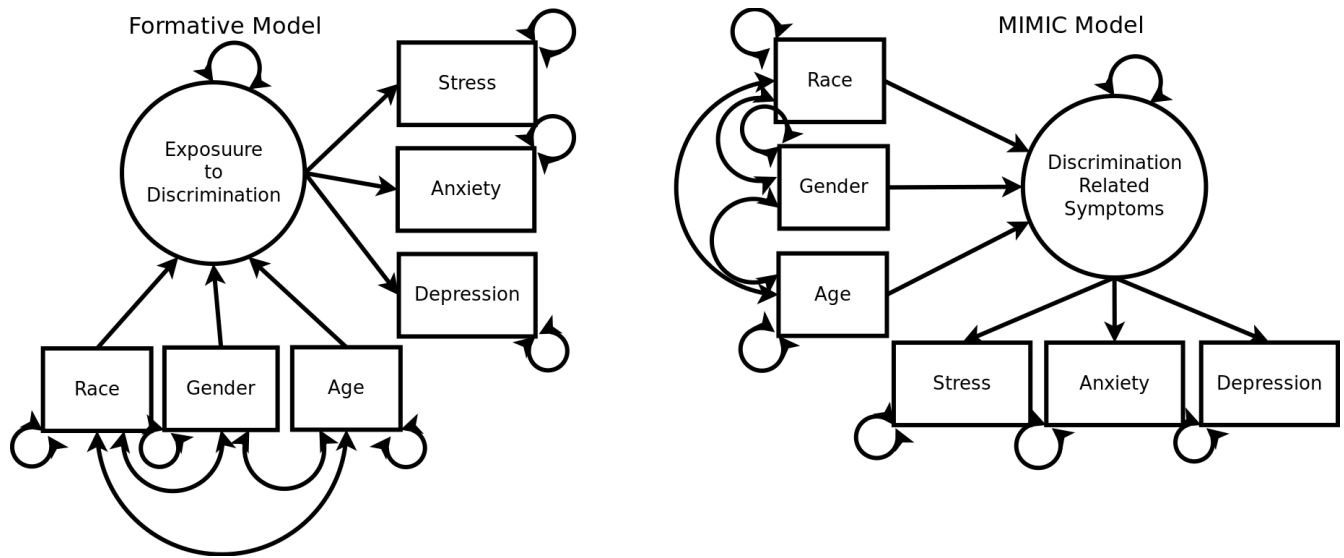

Supplement: 1614-2241_a000154_esm1.pdf [file 1614-2241_a000154_esm1.pdf]
